# Supplementary material for: The Internet, Apps, and the Anesthesiologist
Source: MDPI journal article supplement (doi:10.3390/healthcare11223000), 2023-11-20
Supplement: s1 [file s1]

## Supplementary Materials

**Table S1:** Examples of Apps used in Anesthesia

| App name                                                                                                                                               | App type                                                                                                                                                                                                               | Clinical Area                                                                            | Description                                                                                        | Cost                                               | URL                                                                                                                                                         |
|--------------------------------------------------------------------------------------------------------------------------------------------------------|------------------------------------------------------------------------------------------------------------------------------------------------------------------------------------------------------------------------|------------------------------------------------------------------------------------------|----------------------------------------------------------------------------------------------------|----------------------------------------------------|-------------------------------------------------------------------------------------------------------------------------------------------------------------|
| <b>General clinical support</b>                                                                                                                        |                                                                                                                                                                                                                        |                                                                                          |                                                                                                    |                                                    |                                                                                                                                                             |
| <br>5 Minute Anesthesia Consult                                       | Healthcare provider decision support<br>Drug references, medication management<br>Reference texts/journals, training and education<br>Patient centred app                                                              | Pre-operative setting<br>General anesthesia<br>Surgical specialty                        | Thorough pathology-based app extending from pre-operative management to intra-operative management | Free<br><br>In-app purchase<br>\$119.99            | <a href="https://apps.apple.com/us/app/5-minute-anesthesia-consult/id1102384412">https://apps.apple.com/us/app/5-minute-anesthesia-consult/id1102384412</a> |
| <br>AAGBI (Association of Anaesthetists of Great Britain and Ireland) | Healthcare provider decision support<br>Drug references, medication management<br>Reference texts/ journals, training and education<br>Medical calculators<br>Healthcare provider communication/ referral coordination | Pre-operative setting<br>General anesthesia<br>Surgical specialty<br>Regional anesthesia | Centralised hub for interaction between anaesthetists, guidelines, and education                   | Free                                               | <a href="https://apps.apple.com/us/app/association-of-anaesthetists/id913194458">https://apps.apple.com/us/app/association-of-anaesthetists/id913194458</a> |
| <br>Anesthesia 411                                                    | Healthcare provider decision support<br>Drug references, medication management<br>Reference texts/journals, training and education                                                                                     | General anesthesia<br>Surgical specialty                                                 | Specific procedures and the integral information for anaesthetists to perform them safely          | \$3.99                                             | <a href="https://apps.apple.com/us/app/anesthesia-411/id449473295">https://apps.apple.com/us/app/anesthesia-411/id449473295</a>                             |
| <br>Anesthesia Central                                              | Healthcare provider decision support<br>Drug references, medication management<br>Reference texts/ journals, training and education                                                                                    | General anesthesia<br>Surgical specialty                                                 | Combination resource allowing for multiple uses across several domains                             | Free<br><br>In-app purchases<br>\$99.99 - \$169.99 | <a href="https://apps.apple.com/us/app/anesthesia-central/id347656772">https://apps.apple.com/us/app/anesthesia-central/id347656772</a>                     |
| App name                                                                                                                                               | App type                                                                                                                                                                                                               | Clinical Area                                                                            | Description                                                                                        | Cost                                               | URL                                                                                                                                                         |

|                                                                                                                                          |                                                                                                                                                                                                                     |                                                                      |                                                                                           |                                 |                                                                                                                                                                                                  |
|------------------------------------------------------------------------------------------------------------------------------------------|---------------------------------------------------------------------------------------------------------------------------------------------------------------------------------------------------------------------|----------------------------------------------------------------------|-------------------------------------------------------------------------------------------|---------------------------------|--------------------------------------------------------------------------------------------------------------------------------------------------------------------------------------------------|
|  <p>ASRA Coags</p>                                      | <p>Healthcare provider decision support</p> <p>Drug references, medication management</p>                                                                                                                           | <p>Pre-operative</p> <p>Regional anesthesia</p> <p>Pain medicine</p> | <p>Guidelines provided for regional anesthesia and pain management</p>                    | <p>\$3.99</p>                   | <p><a href="https://apps.apple.com/us/app/asra-coags/id858796572">https://apps.apple.com/us/app/asra-coags/id858796572</a></p>                                                                   |
|  <p>Anesthesia Pre-Op</p>                               | <p>Patient centred app</p> <p>Healthcare provider decision support</p> <p>Patient centred app</p>                                                                                                                   | <p>Pre-operative setting</p>                                         | <p>Provides checklist for pre-operative patient assessment</p>                            | <p>Free</p>                     | <p><a href="https://play.google.com/store/apps/details?id=com.mobincube.anesthesia_pre_op.sc">https://play.google.com/store/apps/details?id=com.mobincube.anesthesia_pre_op.sc</a> HNMR4H</p>    |
|  <p>MyATLS</p>                                          | <p>Healthcare provider decision support</p> <p>Drug references, medication management</p>                                                                                                                           | <p>General anesthesia</p> <p>Surgical specialty</p>                  | <p>Easy to access trauma based clinical decision support tool</p>                         | <p>\$1.22 - \$9.77 per item</p> | <p><a href="https://play.google.com/store/apps/details?id=com.echo.myatls">https://play.google.com/store/apps/details?id=com.echo.myatls</a></p>                                                 |
|  <p>Regional Anesthesia Reference</p>                   | <p>Medical calculators</p> <p>Reference texts/journals, training and education</p> <p>Drug references, medication management</p> <p>Medical calculators</p> <p>Reference texts/journals, training and education</p> | <p>Regional anesthesia</p>                                           | <p>Provides education about regional anesthesia, recommended analgesia and calculator</p> | <p>Free</p>                     | <p><a href="https://play.google.com/store/apps/details?id=com.awalters.regionalanesthesiaatlas">https://play.google.com/store/apps/details?id=com.awalters.regionalanesthesiaatlas</a></p>       |
|  <p>TTE Standard Views</p>                             | <p>Reference texts/journals, training and education</p>                                                                                                                                                             | <p>Pre-operative</p>                                                 | <p>Provides 3-dimensional context for images viewed in transthoracic echocardiography</p> | <p>\$4.99</p>                   | <p><a href="https://apps.apple.com/us/app/tte-standard-views/id660856485">https://apps.apple.com/us/app/tte-standard-views/id660856485</a></p>                                                   |
|  <p>ECHO Views - Transesophageal Echocardiography</p> | <p>Reference texts/journals, training and education</p>                                                                                                                                                             | <p>Pre-operative</p>                                                 | <p>Transesophageal Echocardiography educational resource</p>                              | <p>\$9.99</p>                   | <p><a href="https://apps.apple.com/us/app/echo-views-transesophageal-echocardiography/id447218400">https://apps.apple.com/us/app/echo-views-transesophageal-echocardiography/id447218400</a></p> |

| App name                                                                                                   | App type                                                                                              | Clinical Area                                                                                                | Description                                                                        | Cost                                           | URL                                                                                                                                                                                         |
|------------------------------------------------------------------------------------------------------------|-------------------------------------------------------------------------------------------------------|--------------------------------------------------------------------------------------------------------------|------------------------------------------------------------------------------------|------------------------------------------------|---------------------------------------------------------------------------------------------------------------------------------------------------------------------------------------------|
| <br>iTIVA Anesthesia      | Reference texts/journals, training and education                                                      | General anesthesia                                                                                           | Simulation based learning of TIVA                                                  | Free<br>In-app purchase<br>\$9.99              | <a href="https://apps.apple.com/us/app/itiva-anesthesia/id635652167">https://apps.apple.com/us/app/itiva-anesthesia/id635652167</a>                                                         |
| <br>Medscape              | Healthcare provider decision support<br>Reference texts/ journals, training and education             | Pre-operative<br>General anesthesia<br>Paediatric setting<br>Surgical specialty<br>Regional anesthesia; Pain | Search engine database                                                             | Free                                           | <a href="https://play.google.com/store/apps/details?id=com.medscape.android">https://play.google.com/store/apps/details?id=com.medscape.android</a>                                         |
| <b>Drug References/ Medication Management</b>                                                              |                                                                                                       |                                                                                                              |                                                                                    |                                                |                                                                                                                                                                                             |
| <br>Anaesthetic Drugs     | Drug references, medication management                                                                | General anesthesia<br>Pain medicine                                                                          | Provides doses for common medications used in anesthesia                           | Free                                           | <a href="https://play.google.com/store/apps/details?id=com.mobincube.anesthetic_drugs.sc_HC5XV7">https://play.google.com/store/apps/details?id=com.mobincube.anesthetic_drugs.sc_HC5XV7</a> |
| <br>Anesthesia Drugs Fast | Drug references, medication management                                                                | General anesthesia<br>Paediatric setting<br>Pain medicine                                                    | Provides doses, ranges, calculations for a wide variety of anaesthetic medications | \$1.35                                         | <a href="https://play.google.com/store/apps/details?id=com.hofficer.anesthesiadrugsfast">https://play.google.com/store/apps/details?id=com.hofficer.anesthesiadrugsfast</a>                 |
| <br>Epocrates            | Healthcare provider decision support<br>Drug references, medication management<br>Medical calculators | General anesthesia<br>Paediatric setting<br>Pain medicine                                                    | Provides easy access to drug doses, monographs, drug calculators                   | Free<br>In-app purchases<br>\$24.99 - \$349.99 | <a href="https://play.google.com/store/apps/details?id=com.epocrates&amp;hl=en_AU">https://play.google.com/store/apps/details?id=com.epocrates&amp;hl=en_AU</a>                             |
| <b>Medical Calculators</b>                                                                                 |                                                                                                       |                                                                                                              |                                                                                    |                                                |                                                                                                                                                                                             |
| <br>Calculate by QxMD   | Healthcare provider decision support<br>Drug references, medication management<br>Medical Calculator  | Pre-operative<br>General anesthesia<br>Surgical specialty                                                    | Centralised location for clinical point of care tools                              | Free                                           | <a href="https://apps.apple.com/us/app/calculate-by-qxmd/id361811483">https://apps.apple.com/us/app/calculate-by-qxmd/id361811483</a>                                                       |
| App name                                                                                                   | App type                                                                                              | Clinical Area                                                                                                | Description                                                                        | Cost                                           | URL                                                                                                                                                                                         |

|                                                                                   |                                                                                                       |                    |                                              |      |                                                                                                                                             |
|-----------------------------------------------------------------------------------|-------------------------------------------------------------------------------------------------------|--------------------|----------------------------------------------|------|---------------------------------------------------------------------------------------------------------------------------------------------|
|   | Drug references, medication management                                                                | Pain medicine      | Calculates oral morphine equivalents         | Free | <a href="https://apps.apple.com/ca/app/opioioid-calculator/id1039219870">https://apps.apple.com/ca/app/opioioid-calculator/id1039219870</a> |
| Opioid Calculator                                                                 |                                                                                                       |                    |                                              |      |                                                                                                                                             |
|  | Healthcare provider decision support<br>Drug references, medication management<br>Medical calculators | Paediatric setting | Combination resource providing multiple aids | Free | <a href="https://apps.apple.com/us/app/pedi-anesth/id1019040157">https://apps.apple.com/us/app/pedi-anesth/id1019040157</a>                 |
| Pedi-Anesth                                                                       |                                                                                                       |                    |                                              |      |                                                                                                                                             |

## Reference Texts

|                                                                                     |                                                  |                                                                                                        |                                                                       |                                                |                                                                                                                                                                                                                                       |
|-------------------------------------------------------------------------------------|--------------------------------------------------|--------------------------------------------------------------------------------------------------------|-----------------------------------------------------------------------|------------------------------------------------|---------------------------------------------------------------------------------------------------------------------------------------------------------------------------------------------------------------------------------------|
| 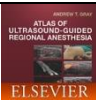   | Reference texts/journals, training and education | Regional anesthesia                                                                                    | In depth teaching of ultrasound guided regional anesthesia techniques | Free<br>In-app purchases<br>\$64.99 - \$129.99 | <a href="https://play.google.com/store/apps/details?id=com.mobisystems.msdictionary.embedded.wireless.elsevier.angua">https://play.google.com/store/apps/details?id=com.mobisystems.msdictionary.embedded.wireless.elsevier.angua</a> |
| Atlas of Ultrasound Anesthesia                                                      |                                                  |                                                                                                        |                                                                       |                                                |                                                                                                                                                                                                                                       |
|    | Reference texts/journals                         | General anesthesia<br>Paediatric setting<br>Surgical specialty<br>Regional anesthesia<br>Pain medicine | Textbook                                                              | Free                                           | <a href="https://play.google.com/store/apps/details?id=com.andromo.dev658544.app945759">https://play.google.com/store/apps/details?id=com.andromo.dev658544.app945759</a>                                                             |
| Anaesthesiology - Paediatric & Clinical Anaesthesiology                             |                                                  |                                                                                                        |                                                                       |                                                |                                                                                                                                                                                                                                       |
|   | Reference texts/journals, training and education | Regional anesthesia                                                                                    | Regional anesthesia educational resource                              | Free<br>In-app purchase<br>\$19.99 - \$169.99. | <a href="https://apps.apple.com/us/app/blockjocks/id1232060664">https://apps.apple.com/us/app/blockjocks/id1232060664</a>                                                                                                             |
| BLOCKJOCKS Regional Anesthesia                                                      |                                                  |                                                                                                        |                                                                       |                                                |                                                                                                                                                                                                                                       |
|  | Reference texts/journals, training and education | Regional anesthesia                                                                                    | Regional anesthesia educational resource                              | \$9.99                                         | <a href="https://apps.apple.com/us/app/block-guru-lite/id829739487">https://apps.apple.com/us/app/block-guru-lite/id829739487</a>                                                                                                     |
| Block GuRU Lite                                                                     |                                                  |                                                                                                        |                                                                       |                                                |                                                                                                                                                                                                                                       |

| App name | App type | Clinical Area | Description | Cost | URL |
|----------|----------|---------------|-------------|------|-----|
|----------|----------|---------------|-------------|------|-----|

| <br>Case Files Anaesthesiology                                | Reference texts/journals, training and education                                                                  | General anesthesia<br>Surgical specialty<br>Regional anesthesia<br>Pain medicine | Case-based learning, with exam-based questions                                               | Free<br><br>In-app purchase \$29.99           | <a href="https://apps.apple.com/us/app/case-files-anesthesiology-1e/id461592758">https://apps.apple.com/us/app/case-files-anesthesiology-1e/id461592758</a>                                             |
|-----------------------------------------------------------------------------------------------------------------------------------------------|-------------------------------------------------------------------------------------------------------------------|----------------------------------------------------------------------------------|----------------------------------------------------------------------------------------------|-----------------------------------------------|---------------------------------------------------------------------------------------------------------------------------------------------------------------------------------------------------------|
| <br>Echocardiography pocketcards                             | Reference texts/journals, training and education                                                                  | Pre-operative                                                                    | Flashcard based education                                                                    | \$3.99                                        | <a href="https://apps.apple.com/us/app/ec-hocardiography-pocketcards/id359676863">https://apps.apple.com/us/app/ec-hocardiography-pocketcards/id359676863</a>                                           |
| <br>Read by QxMD                                             | Reference texts/ journals, training and education                                                                 | Multiple                                                                         | Access to up-to-date and new journal articles, can be filtered to fit specific interests     | Free                                          | <a href="https://apps.apple.com/us/app/read-by-qxmd/id574041839">https://apps.apple.com/us/app/read-by-qxmd/id574041839</a>                                                                             |
| <br>Handbook of Clinical Anesthesia                          | Reference texts/journals, training and education<br>Drug references, medication management<br>Medical calculators | Pre-operative<br>General anesthesia<br>Surgical specialty<br>Regional anesthesia | Provides comprehensive guidelines, recommendations, information for practicing anaesthetists | Free<br><br>In-app purchases \$52.99 - 104.99 | <a href="https://play.google.com/store/apps/details?id=com.medpresso.Lonestar.clinanes">https://play.google.com/store/apps/details?id=com.medpresso.Lonestar.clinanes</a>                               |
| <br>Anesthesia by Dr. Swati Singh                            | Reference texts/journals, training and education                                                                  | Pre-operative<br>General anesthesia<br>Surgical specialty<br>Regional anesthesia | Study tool for anesthetics topics                                                            | Free                                          | <a href="https://play.google.com/store/apps/details?id=com.prepladder.anesthesia">https://play.google.com/store/apps/details?id=com.prepladder.anesthesia</a>                                           |
| <br>Morgan & Mikhail's Clinical Anaesthesiology Flashcards | Reference texts/journals, training and education                                                                  | General anesthesia<br>Surgical specialty<br>Regional anesthesia                  | Flashcard based learning focusing on anesthetics core knowledge                              | Free<br><br>In-app purchase \$44.99           | <a href="https://apps.apple.com/us/app/morgan-mikhails-clinical-anesthesiology-flashcards/id916009564">https://apps.apple.com/us/app/morgan-mikhails-clinical-anesthesiology-flashcards/id916009564</a> |
| App name                                                                                                                                      | App type                                                                                                          | Clinical Area                                                                    | Description                                                                                  | Cost                                          | URL                                                                                                                                                                                                     |
| <b>Communication</b>                                                                                                                          |                                                                                                                   |                                                                                  |                                                                                              |                                               |                                                                                                                                                                                                         |
| AIRS mobile app                                                                                                                               | Communication                                                                                                     | General anesthesia                                                               | Online patient safety reporting system                                                       | Free                                          | <a href="https://qualityportal.aqihq.org/AIRSMMain/AIRSCaseEntry">https://qualityportal.aqihq.org/AIRSMMain/AIRSCaseEntry</a>                                                                           |

---

## Electronic Medical Record

---

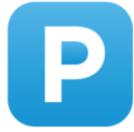

Powerchart Touch

*TIVA: Total intravenous anesthesia.*

---

|                           |                    |                                                                                                         |                                     |                                                                                                                   |
|---------------------------|--------------------|---------------------------------------------------------------------------------------------------------|-------------------------------------|-------------------------------------------------------------------------------------------------------------------|
| Electronic medical record | General anesthesia | Mobile access to patient notes, pathology results, clinical photography for users within Cerner network | Free (with eligible Cerner systems) | <a href="https://www.cerner.com/solutions/powerchart-touch">https://www.cerner.com/solutions/powerchart-touch</a> |
|---------------------------|--------------------|---------------------------------------------------------------------------------------------------------|-------------------------------------|-------------------------------------------------------------------------------------------------------------------|

### Supplementary Figure S1 Worked Example

*"I am a predominantly adult anaesthetist but work in a rural/ regional centre and must occasionally anaesthetise children. I am not the most technologically literate but use an iPhone."*

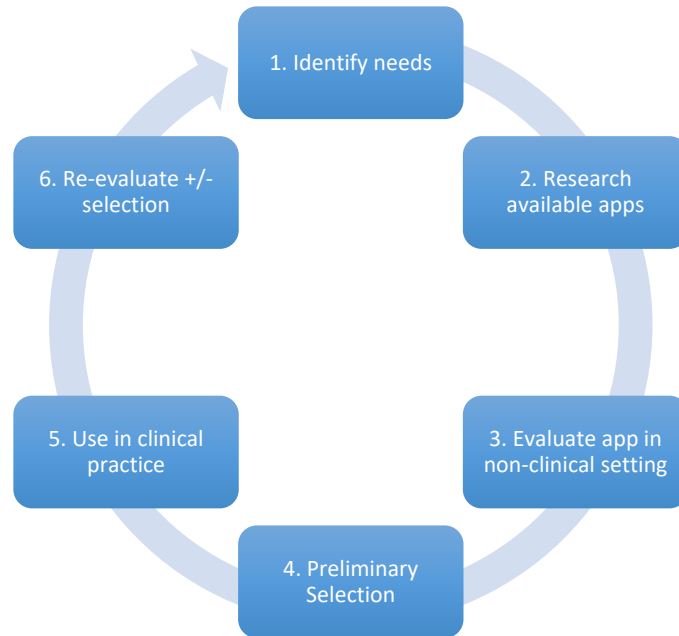

#### 1. *Identify needs*

I have considered aspects of my practice that would be augmented by technology, and have decided Paediatric dose calculations are something I frequently double check, and would be improved with an app.

#### 2. *Research available apps*

I have discussed with paediatric anaesthetic colleagues, registrars and collated a list of potential apps, as well as used the Google Search engine and Apple App store to identify further options.

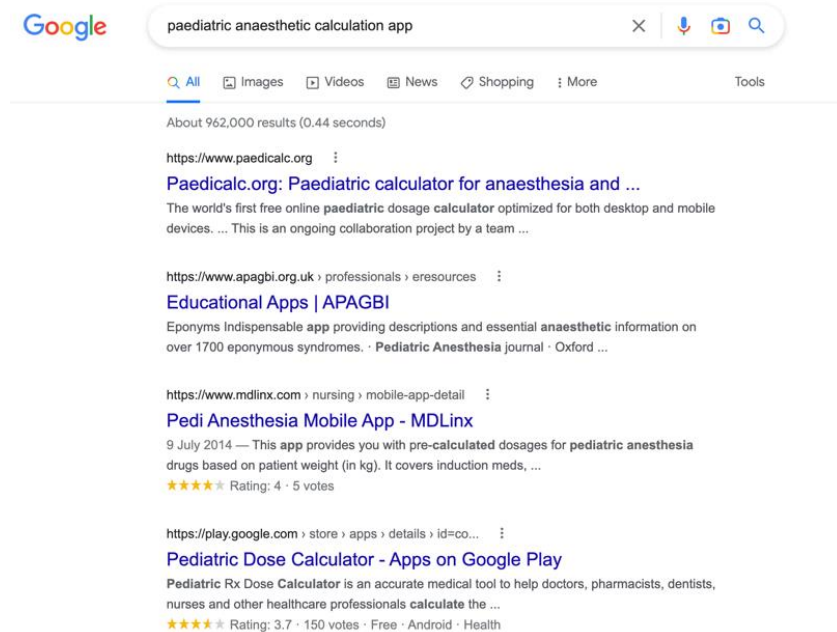

Additionally, I have looked up the most promising apps in journals and websites such as iMedical Apps, and looked at reviews.

### 3. *Trial app in a non-clinical setting*

From the searches and reviews above, I have narrowed the choice down to around 3 potential apps, and downloaded these onto my phone. Using the provided Table 1, it looks as though app functionality and cost will be my two main criteria. Evaluating the provided apps using Table 1, there is one app I think will be most suited to my needs.

### 4. *Preliminary selection*

After conferring with colleagues and reading reviews more carefully for the selected app, I agree that this app is one I will trial.

### 5. *Use in clinical practice*

I will use the app in theatre, noting the aspects of my work it improves, and areas where the app perhaps falls short.

### 6. *Re-evaluate the app*

After a period (I will select a month), I will take out some conscious time and evaluate the app, and evaluate using the rubric in Table 1 whether I will continue to use the app.
